# Supplementary material for: Assessment of Mitochondrial Dysfunction in Experimental Autoimmune Encephalomyelitis (EAE) Models of Multiple Sclerosis
Source: MDPI journal article supplement (doi:10.3390/ijms20204975), 2019-10-09
Supplement: s1 [file s1]

| Clinical Sign                                          | Score |
|--------------------------------------------------------|-------|
| • Slightly flaccid tail                                | 1     |
| • Slight tail spasticity                               |       |
| • Flaccid tail                                         | 1.5   |
| • Tail spasticity                                      |       |
| • Slightly impaired righting reflex                    | 2     |
| • Impaired righting reflex                             | 2.5   |
| • Slight hind limb weakness                            | 3     |
| • Unilateral hind limb weakness                        |       |
| • Slight hind limb spasticity                          |       |
| • Unilateral hind limb spasticity                      |       |
| • Bilateral hind limb weakness                         | 3.5   |
| • Bilateral hind limb spasticity                       |       |
| • Weakness in one hind limb, paralysis in the other    | 4     |
| • Severe bilateral hind limb weakness                  |       |
| • Hind limb spasticity causing immobility in same limb |       |
| • Severe bilateral hind limb spasticity                |       |
| • Hind limb paralysis                                  | 4     |
| • Hind limb spasticity with both limbs paralysed       |       |
| • Slight fore limb spasticity                          | 4.5   |
| • Unilateral fore limb weakness                        |       |
| • Fore limb weakness                                   | 5     |
| • Fore limb spasticity                                 |       |
| • Weakness in one fore limb, paralysis in the other    | 5.5   |
| • Severe fore limb weakness                            |       |
| • Spasticity in one fore limb, paralysis in the other  |       |
| • Severe fore limb spasticity                          |       |
| • Bilateral fore limb paralysis                        | 6.5   |
| • Bilateral fore limb spasticity and immobility        |       |
| • Moribund or dead                                     | 7     |

**Supplementary Figure S1.** Clinical scoring table for signs of neurological deficits in murine models, adapted from Miller et al. [56]. Clinical signs for neurological deficits in mice are matched with a score for the determination of severity of disease. In this study, mice were scored on experimental autoimmune encephalomyelitis (EAE) clinical symptoms. Presymptomatic mice for the 3 DPI and 10 DPI time-points were ensured free of neurological deficits. Signs of neurological deficit appeared from 12 DPI, reaching hind-limb paralysis (score 4 of the 7-point grading scale) at around day 18. Mice at 17 DPI are therefore expected to be symptomatic (score 4), but only neurologically asymptomatic mice were selected for this time-point in this study, demonstrating that although no outward symptoms present in these mice induced with EAE, metabolic functions are altered.
